# Supplementary material
Source: PubMed Central journal article supplement (PMC7585617)
Supplement: Supp_FigS1.pdf [file Supp_FigS1.pdf]

## Supplementary Data

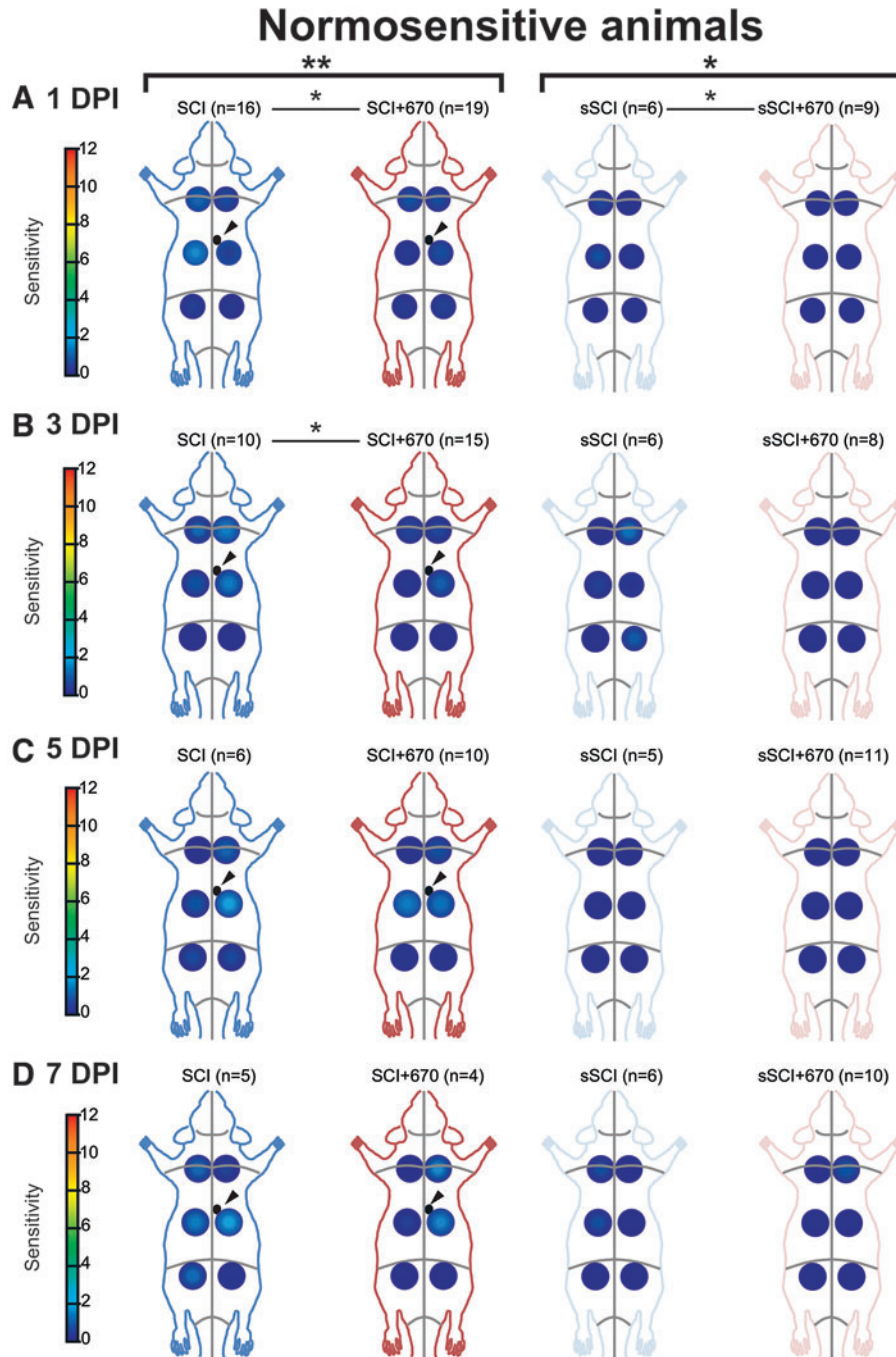

**SUPPLEMENTARY FIG. S1.** Red-light treatment reduces regional sensitivity scores (RSSs) in normosensitive animals. RSSs in SCI (blue), SCI+670 (red), sSCI (light blue), and sSCI+670 (pink) animals at (A) 1 dpi, (B) 3 dpi, (C) 5 dpi, and (D) 7 dpi are shown for animals that did not develop hypersensitivity. Arrowheads indicate location of T10 hemi-contusion injury (small black circles) in spinal-cord injured groups. Statistical comparisons between two groups across all time-points (black bracket, CLMM), across all levels at individual time-point (black lines, CLMM), and between two groups at different time levels (gray lines, CLMM) are indicated. Data are expressed as mean  $\pm$  SEM as per Figure 1A inset; *n* values indicated for each group; \**p* < 0.05, \*\**p* < 0.01, CLMM. CLMM, cumulative link mixed model; dpi, day post-injury; SCI, spinal-cord injured untreated; SCI+670, spinal-cord injured + red-light treatment; sSCI, sham-injured untreated; sSCI+670, sham-injured + red-light treatment; SEM, standard error of the mean.
