# Supplementary material
Source: PubMed Central journal article supplement (PMC7585617)
Supplement: Supp_FigS3.pdf [file Supp_FigS3.pdf]

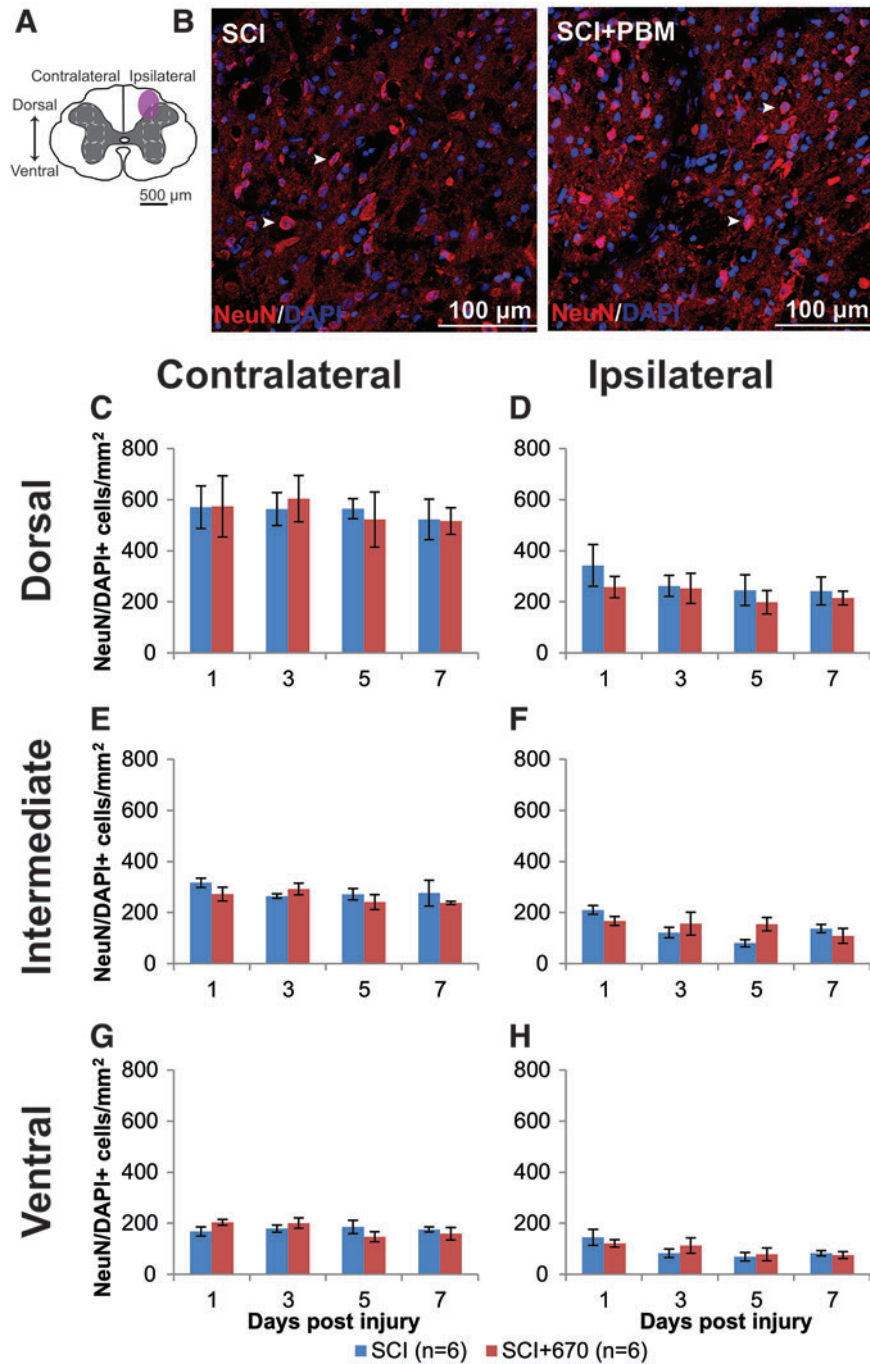

**SUPPLEMENTARY FIG. S3.** Neuronal cell density is reduced ipsilateral to SCI but not altered by 670 nm treatment. (A) The schematic representation of the spinal cord illustrates the dorsal, intermediate, and ventral regions of interest for analysis (enclosed by dashed lines, 0.1 mm<sup>2</sup>). Approximate location of injury epicenter is indicated by the purple shaded area. (B) Example images of NeuN (red) and DAPI (blue) double-positive cells from spinal-cord injured untreated and light-treated groups ipsilateral to the injury at 1 dpi. (C,D) Quantification of NeuN<sup>+</sup>DAPI<sup>+</sup> cells, expressed as double-positive cell density within the region of interest, in the dorsal region of the spinal cord, contralateral (C) and ipsilateral (D) to the injury of untreated and light-treated groups. (E,F) NeuN<sup>+</sup>DAPI<sup>+</sup> cell density in the intermediate regions of interest contralateral (E) and ipsilateral (F) to the injury. (G,H) NeuN<sup>+</sup>DAPI<sup>+</sup> cell density in the ventral regions of interest contralateral (G) and ipsilateral (H) to the injury. Data are expressed as mean ± SEM; *n* values indicated (legend) are for each time-point. dpi, day post-injury; SCI, spinal-cord injured untreated; SCI+670, spinal-cord injured + red-light treatment; SEM, standard error of the mean.
